# Supplementary material
Source: publisher figshare collection journal article supplement (https://frontiersin.figshare.com/ndownloader/files/13663427)
Supplement: Supplementary file [file 13663427]

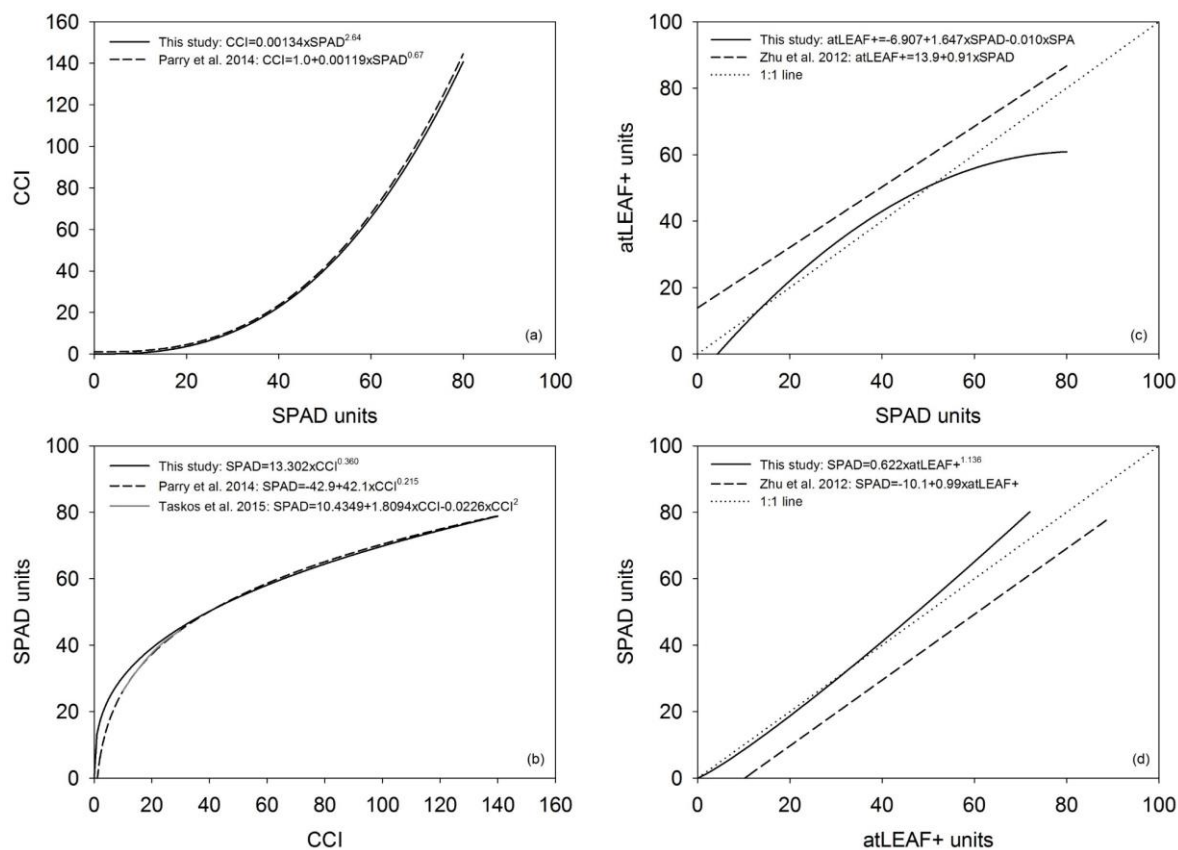

Figure S7. Comparison of relationships between: SPAD units and CCI values (a), CCI values and SPAD units (b), SPAD units and atLEAF units (c), and atLEAF units and SPAD units (d), of the present study and the literature. CCI is chlorophyll content index, measured with the MC-100 meter.
